# Supplementary material for: Genes Belonging to the Insulin and Ecdysone Signaling Pathways Can Contribute to Developmental Time, Lifespan and Abdominal Size Variation in Drosophila americana
Source: PLoS One. 2014 Jan 28;9(1):e86690. doi: 10.1371/journal.pone.0086690 (PMC3904916; doi:10.1371/journal.pone.0086690)
Supplement: Table S2 — Results of the F2 H5♂xW11♀ association study for developmental time. (XLS) [file pone.0086690.s003.xls]

## Sheet: Sheet1
Table S2 - Molecular markers characteristics and statistics for the F2 association study involving strains H5 and W11. Estimated distance from the telomere (in Mb) for each D. americana marker developed for Muller's elements A-E (Dist), significance of the genotype-phenotype (developmental time in days) association (using the Mann-Whitney or the Kruskal-Wallis non-parametric test depending on the…
Muller's element	Marker	Dist	p-value	Hem 1	Hem 2	Hom 1	Hom 2	Het 1/2	Hom 3	Het 1/3	Het 2/3	Hom 4	Het 1/4	Het 3/4	Het 1/3.5	Het 3/3.5	Het 3.5/4	R2	Ext
A	A1	4.0	ns	16.13 (71)	15.69 (59)													0.76	2.80
	A2	7.2	ns	15.91 (76)	15.87 (54)													0.00	0.25
	A3	9.3	ns	15.95 (76)	15.83 (54)													0.05	0.76
	A4	12.3	ns	15.89 (79)	16.08 (49)													0.14	1.20
	A5	14.4	ns	15.77 (78)	16.10 (52)													0.42	2.09
	A6	17.4	ns	16.13 (53)	15.77 (78)													0.52	2.28
	A7	21.4	ns	16.17 (52)	15.75 (79)													0.72	2.67
	A8	26.2	ns	15.65 (68)	16.08 (48)													0.83	2.75
B	B1	2.5	ns				16.00 (54)	15.94 (63)										0.00	0.38
	B2	5.9	ns			15.84 (62)		15.70 (60)										0.05	0.89
	B3	7.9	ns				16.13 (70)	15.65 (54)										0.92	3.07
	B4	10.0	ns			15.77 (48)	15.83 (65)											0.01	0.38
	B5	12.9	ns				16.18 (67)	15.81 (58)										0.46	2.34
	B6	15.7	ns				15.97 (61)	15.90 (67)										0.01	0.44
	B7	18.5	ns			15.87 (67)		16.29 (42)										0.50	2.65
	B8	21.2	ns			15.84 (75)		16.05 (55)										0.13	1.33
	B9	24.5	ns			16.11 (54)		15.80 (76)										0.38	1.96
	B10	26.9	ns			15.48 (66)		15.85 (34)										0.56	2.39
C	C1	0.5	ns			17.13 (23)	15.56 (43)	15.78 (58)										5.34	10.10
	C2	3.7	P=0.000			18.05 (20)	15.36 (42)	15.66 (68)										13.76	17.51
	C3	6.2	P=0.000			18.36 (11)	18.64 (11)		15.55 (51)	16.05 (20)	14.70 (33)							26.52	26.80
	C4	9.3	P=0.000			19.25 (16)	15.84 (65)	14.98 (43)										28.41	28.51
	C5	11.5	P=0.000			15.60 (50)	18.84 (26)	14.83 (54)										36.97	27.04
	C6	14.3	P=0.000			15.00 (16)	17.36 (61)	14.56 (54)										30.36	19.23
	C7	16.8	P=0.000			15.97 (38)	18.67 (51)	14.83 (22)										32.72	25.89
	C8	20.5	P=0.000			18.52 (27)	15.78 (40)	14.85 (48)										32.60	24.71
	C9	23.1	P=0.000			18.13 (16)	15.21 (39)	15.60 (62)										14.90	19.20
D	D1	0.6	P=0.004			16.00 (15)	14.00 (1)	18.00 (3)	15.63 (38)	15.53 (59)	18.67 (9)							12.60	20.22
	D2	2.8	ns			15.74 (27)	16.30 (27)	15.85 (73)										0.76	3.56
	D3	7.3	ns			15.28 (18)	16.32 (28)	15.99 (68)										1.69	6.81
	D4	9.8	ns			15.42 (19)	16.43 (30)	15.83 (80)										1.74	6.55
	D5	12.5	ns			15.96 (57)		15.61 (18)		16.06 (51)	15.67 (3)							0.36	2.88
	D6	15.9	ns			16.52 (29)	15.38 (16)	15.86 (84)										1.99	7.41
	D7	18.5	ns			15.69 (16)	16.56 (27)	15.78 (85)										1.80	5.54
	D8	21.5	ns			16.22 (46)	15.47 (15)	15.76 (67)										1.19	4.85
	D9	24.2	P=0.038			17.42 (12)	16.00 (55)	15.50 (54)										5.02	12.39
E	E1	0.0	ns			15.68 (25)	16.07 (29)	16.15 (55)										0.62	3.00
	E2	3.1	ns			16.64 (28)	15.50 (26)	15.73 (73)										2.72	7.35
	E3	6.1	ns				15.90 (72)	15.93 (57)										0.00	0.19
	E4	8.8	ns				16.57 (23)	15.95 (42)	15.89 (9)	16.50 (16)	15.48 (33)							2.89	7.04
	E5	12.1	ns			16.78 (32)	15.42 (19)	15.66 (79)										4.12	8.82
	E6	20.5	ns			16.76 (29)	18.00 (1)	15.27 (41)		16.00 (39)	15.78 (18)							5.52	9.76
	E7	27.9	P=0.039			17.47 (17)				16.28 (25)		16.00 (2)	15.73 (11)	15.67 (18)	14.71 (24)	15.47 (15)	16.27 (15)	11.16	18.76
