# Supplementary material for: Genes Belonging to the Insulin and Ecdysone Signaling Pathways Can Contribute to Developmental Time, Lifespan and Abdominal Size Variation in Drosophila americana
Source: PLoS One. 2014 Jan 28;9(1):e86690. doi: 10.1371/journal.pone.0086690 (PMC3904916; doi:10.1371/journal.pone.0086690)
Supplement: Table S3 — Results of the F2 H5♂xW11♀ association study for life span. (XLS) [file pone.0086690.s004.xls]

## Sheet: Sheet1
Table S3 - Molecular markers characteristics and statistics for the F2 association study involving strains H5 and W11. Estimated distance from the telomere (in Mb) for each D. americana marker developed for Muller's elements A-E (Dist), significance of the genotype-phenotype (life span in days) association (using the Mann-Whitney or the Kruskal-Wallis non-parametric test depending on the number o…
Muller's element	Marker	Dist	p-value	Hem 1	Hem 2	Hom 1	Hom 2	Het 1/2	Hom 3	Het 1/3	Het 2/3	Hom 4	Het 1/4	Het 3/4	Het 1/3.5	Het 3/3.5	Het 3.5/4	R2	Ext
A	A1	4.0	ns	57.73 (71)	59.08 (59)													0.1	2.34
	A2	7.2	ns	57.47 (76)	60.02 (54)													0.32	4.44
	A3	9.3	ns	56.53 (76)	61.41 (54)													1.21	8.63
	A4	12.3	ns	55.85 (79)	61.63 (49)													1.64	10.34
	A5	14.4	ns	57.29 (78)	60.60 (52)													0.55	5.78
	A6	17.4	ns	60.04 (53)	57.29 (78)													0.38	4.8
	A7	21.4	ns	59.21 (52)	57.87 (79)													0.09	2.32
	A8	26.2	ns	58.97 (68)	61.35 (48)													0.3	4.04
B	B1	2.5	ns				58.06 (54)	62.49 (63)										1	7.63
	B2	5.9	ns			58.00 (62)		60.73 (60)										0.36	4.71
	B3	7.9	ns				58.51 (70)	58.85 (54)										0.01	0.58
	B4	10.0	ns			60.35 (48)	57.94 (65)											0.29	4.16
	B5	12.9	ns				59.91 (67)	57.84 (58)										0.24	3.58
	B6	15.7	ns				60.49 (61)	56.55 (67)										0.85	6.97
	B7	18.5	ns			56.64 (67)		51.81 (42)										1.32	9.32
	B8	21.2	ns			56.73 (75)		60.56 (55)										0.79	6.75
	B9	24.5	ns			59.48 (54)		57.55 (76)										0.19	3.35
	B10	26.9	ns			60.91 (66)		63.59 (34)										0.36	4.4
C	C1	0.5	P=0.039			46.96 (23)	63.17 (43)	58.29 (58)										6.81	34.52
	C2	3.7	P=0.010			44.80 (20)	61.02 (42)	60.69 (68)										7.02	36.21
	C3	6.2	P=0.000			44.73 (11)	37.36 (11)		58.14 (51)	62.15 (20)	69.15 (33)							18.4	85.09
	C4	9.3	P=0.000			37.38 (16)	57.98 (65)	66.09 (43)										16	76.81
	C5	11.5	P=0.000			58.74 (50)	41.23 (26)	66.09 (54)										17.56	60.3
	C6	14.3	P=0.001			64.81 (16)	50.16 (61)	65.81 (54)										12.46	31.2
	C7	16.8	P=0.000			53.89 (38)	41.57 (21)	64.75 (52)										15.68	55.76
	C8	20.5	P=0.000			43.15 (27)	61.33 (40)	66.35 (48)										17.31	53.77
	C9	23.1	P=0.017			47.00 (16)	65.77 (39)	58.95 (62)										7.29	39.94
D	D1	0.6	P=0.042			59.60 (15)	96.00 (1)	84.00 (3)	56.13 (38)	59.68 (39)	43.11 (9)							8.47	38.44
	D2	2.8	ns			57.96 (27)	64.67 (27)	55.88 (73)										4.75	15.73
	D3	7.3	P=0.027			45.56 (18)	58.86 (28)	62.36 (68)										7.95	36.87
	D4	9.8	P=0.007			44.42 (19)	57.80 (30)	62.12 (80)										7.84	39.85
	D5	12.5	P=0.01			63.90 (57)		63.83 (18)		51.31 (51)	46.00 (3)							8.58	24.54
	D6	15.9	P<0.001			57.45 (29)	39.25 (16)	62.26 (84)										11.56	58.62
	D7	18.5	P<0.001			40.06 (16)	58.78 (27)	62.21 (85)										10.82	55.29
	D8	21.5	P<0.001			60.59 (46)	40.27 (15)	61.75 (67)										9.73	53.34
	D9	24.2	ns			56.08 (12)	54.93 (55)	61.76 (54)										2.4	12.43
E	E1	0.0	ns			60.40 (25)	63.62 (29)	57.82 (55)										1.12	10.03
	E2	3.1	ns			61.96 (28)	50.23 (26)	60.51 (73)										4	23.35
	E3	6.1	P<0.001				64.31 (72)	50.18 (57)										10.56	28.16
	E4	8.8	P=0.001				65.00 (23)	49.02 (42)	56.78 (9)	56.78 (9)	49.25 (16)	66.55 (33)						14.52	35.76
	E5	12.1	P<0.001			56.50 (32)	41.26 (19)	63.15 (79)										12.18	53.05
	E6	20.5	P<0.001			56.83 (29)	42.00 (1)	72.07 (41)		55.44 (39)	41.89 (18)							22.18	72.05
	E7	27.9	P=0.003							52.84 (25)		46.00 (2)	64.55 (11)	61.06 (18)	71.83 (24)	43.27 (15)	66.47 (15)	18.23	66
