# Supplementary material for: Genes Belonging to the Insulin and Ecdysone Signaling Pathways Can Contribute to Developmental Time, Lifespan and Abdominal Size Variation in Drosophila americana
Source: PLoS One. 2014 Jan 28;9(1):e86690. doi: 10.1371/journal.pone.0086690 (PMC3904916; doi:10.1371/journal.pone.0086690)
Supplement: Table S4 — Results of the F2 H5♂xW11♀ association study for abdominal size. (XLS) [file pone.0086690.s005.xls]

## Sheet: Sheet1
Table S4 - Molecular markers characteristics and statistics for the F2 association study involving strains H5 and W11. Estimated distance from the telomere (in Mb) for each D. americana marker developed for Muller's elements A-E (Dist), significance of the genotype-phenotype (abdominal size relative to the sample's mean) association (using the Mann-Whitney or the Kruskal-Wallis non-parametric tes…
Muller's element	Marker	Dist	p-value	Hem 1	Hem 2	Hom 1	Hom 2	Het 1/2	Hom 3	Het 1/3	Het 2/3	Hom 4	Het 1/4	Het 3/4	Het 1/3.5	Het 3/3.5	Het 3.5/4	R2	Ext
A	A1	4.0	ns	0.9507 (71)	0.9356 (59)													0.25	1.61
	A2	7.2	P=0.017	0.9216 (76)	0.9817 (54)													3.88	6.52
	A3	9.3	P=0.007	0.9137 (76)	0.9844 (54)													5.43	7.74
	A4	12.3	P=0.004	0.9103 (79)	1.0013 (49)													8.47	10
	A5	14.4	P=0.003	0.9117 (78)	0.9957 (52)													7.4	9.21
	A6	17.4	P=0.002	0.9946 (53)	0.9117 (78)													7.29	9.09
	A7	21.4	P=0.001	0.9977 (52)	0.9108 (79)													7.95	9.54
	A8	26.2	P=0.004	0.9102 (68)	0.9909 (48)													7.24	8.87
B	B1	2.5	ns				0.9324 (54)	0.9513 (63)										0.38	2.03
	B2	5.9	ns			0.9567 (62)		0.9398 (60)										0.3	1.8
	B3	7.9	ns				0.9426 (70)	0.9552 (54)										0.17	1.34
	B4	10.0	P=0.008			0.9744 (48)	0.9093 (65)											4.67	7.16
	B5	12.9	P=0.009				0.9714 (67)	0.9088 (58)										4.24	6.89
	B6	15.7	P=0.006				0.9791 (61)	0.9125 (67)										4.75	7.3
	B7	18.5	P<0.001			0.9089 (67)		1.0105 (42)										10.24	11.18
	B8	21.2	P=0.002			0.9099 (75)		0.9936 (55)										7.4	9.2
	B9	24.5	P=0.001			1.0011 (54)		0.9056 (76)										9.67	10.55
	B10	26.9	P=0.003			0.9214 (66)		1.0001 (34)										7.02	8.54
C	C1	0.5	P=0.044			0.8907 (23)	0.9893 (43)	0.9450 (58)										5.2	11.07
	C2	3.7	ns			0.9386 (18)	0.9748 (35)	0.9484 (57)										0.59	3.86
	C3	6.2	P=0.022			0.9575 (10)	0.8125 (11)		0.9914 (44)	0.9538 (15)	0.9175 (28)							11.22	22.02
	C4	9.3	P=0.021			0.8600 (16)	0.9770 (65)	0.9264 (43)										6.86	13.6
	C5	11.5	P=0.026			0.9816 (50)	0.8770 (26)	0.9455 (54)										6.3	11.93
	C6	14.3	ns			0.9693 (13)	0.9502 (53)	0.9548 (45)										0.37	2.01
	C7	16.8	ns			0.9882 (38)	0.8860 (21)	0.9571 (52)										5.2	11.53
	C8	20.5	ns			0.9032 (23)	0.9897 (34)	0.9558 (40)										4.08	9.58
	C9	23.1	ns			0.9133 (14)	0.9471 (32)	0.9454 (54)										0.61	3.7
D	D1	0.6	ns			0.9548 (15)	0.8821 (1)	0.8638 (3)	0.9315 (38)	0.9461 (60)	1.0110 (9)							2.46	8.53
	D2	2.8	ns			0.9185 (28)	0.9488 (27)	0.9570 (73)										1.06	4.19
	D3	7.3	P<0.001			1.0313 (18)	0.8672 (28)	0.9500 (69)										11.83	18.92
	D4	9.8	P<0.001			1.0363 (19)	0.8649 (30)	0.9554 (80)										12.18	19.82
	D5	12.5	P<0.001			0.8885 (57)		0.9150 (18)		1.0142 (51)	0.9896 (3)							15.37	14.15
	D6	15.9	P<0.001			0.8515 (29)	1.0613 (16)	0.9570 (84)										16.32	24.64
	D7	18.5	P<0.001			1.0358 (16)	0.8524 (27)	0.9558 (85)										12.89	21.52
	D8	21.5	P<0.001			0.8717 (46)	1.0605 (15)	0.9683 (67)										16.32	21.66
	D9	24.2	P=0.030			0.8625 (12)	0.9683 (55)	0.9408 (54)										4.16	12.27
E	E1	0.0	ns			0.9469 (25)	0.9685 (29)	0.9324 (55)										0.94	3.87
	E2	3.1	P=0.001			0.8803 (28)	1.0009 (26)	0.9505 (73)										6.76	13.7
	E3	6.1	P<0.001				0.8894 (72)	1.0170 (57)										17.39	14.35
	E4	8.8	P=0.001				0.8989 (23)	1.0178 (42)	0.8830 (9)	0.9620 (16)	0.8961 (33)							13.4	15.27
	E5	12.1	P<0.001			0.8537 (32)	1.0503 (19)	0.9572 (79)										16.48	23.03
	E6	20.5	P<0.001			0.8578 (29)	0.8137 (1)	0.9189 (41)		0.9857 (39)	1.023 (18)							17.39	19.26
	E7	27.9	P<0.001			0.8676 (17)				0.9983 (25)		0.8265 (2)	0.8499 (11)	0.9880 (18)	0.9039 (24)	1.0482 (15)	0.9221 (15)	18.4	23.33
