# Supplementary material for: Genes Belonging to the Insulin and Ecdysone Signaling Pathways Can Contribute to Developmental Time, Lifespan and Abdominal Size Variation in Drosophila americana
Source: PLoS One. 2014 Jan 28;9(1):e86690. doi: 10.1371/journal.pone.0086690 (PMC3904916; doi:10.1371/journal.pone.0086690)
Supplement: Table S7 — Results of the F2 H5♂xW37♀ association study for developmental time. (XLSX) [file pone.0086690.s008.xlsx]

## Sheet: Folha1
Table S7 - Molecular markers characteristics and statistics for the F2 association study involving strains H5 and W37. Estimated distance from the telomere (in Mb) for each D. americana marker developed for Muller's elements A-E (Dist), significance of the genotype-phenotype (developmental time in days) association (using the Mann-Whitney or the Kruskal-Wallis non-parametric test depending on the…
Muller's element	Marker	Dist	Ass	Hem 1	Hem 2	Hom 1	Hom 2	Het 1/2	Hom 3	Het 3/3.5	Het 3/6	Het 3.5/6	R2	Ext
A	A1	4.0	0.233	15.95 (60)	15.49 (70)								1.00	2.97
	A2	7.2	0.356	15.82 (68)	15.56 (62)								0.00	1.67
	A3	9.3	0.181	15.92 (71)	15.44 (59)								1.04	3.10
	A4	12.3	0.039	16.07 (73)	15.23 (57)								3.20	5.52
	A7	21.4	0.002	15.02 (58)	16.25 (72)								6.92	8.19
	A8	26.2	0.009	16.22 (72)	15.05 (58)								6.25	7.77
B	B1	2.5	0.895				15.69 (64)	15.71 (66)					0.00	0.13
	B3	7.9	0.428				15.58 (62)	15.81 (68)					0.24	1.48
	B6	15.7	0.026			15.22 (60)		16.11 (70)					3.69	5.85
	B7	18.5	0.026			16.11 (70)		15.22 (60)					3.69	5.85
	B9	24.5	0.003			15.07 (59)		16.23 (71)					6.15	7.70
	B10	26.9	0.005			16.22 (72)		15.05 (58)					6.25	7.77
C	C3	6.2	0.207			15.98 (44)	16.56 (16)	15.40 (68)					3.10	7.53
	C4	9.3	0.062			16.09 (46)	16.50 (14)	15.28 (68)					3.61	4.43
	C5	11.5	0.017			16.69 (16)	16.09 (46)	15.16 (67)					5.57	10.1
	C7	16.8	0.039			16.39 (18)	16.09 (46)	15.24 (66)					4.16	7.55
D	D1	0.6	0.163			16.28 (40)	15.11 (19)	15.54 (71)					3.10	9.73
	D2	2.8	0.028			15.14 (22)	16.46 (48)	15.30 (60)					6.30	8.72
	D3	7.3	0.005			15.30 (10)	16.54 (54)	15.08 (66)					9.24	9.68
	D5	12.5	0.001			15.09 (11)	16.63 (56)	14.98 (63)					11.97	11.01
E	E1	0.0	0.125			15.24 (17)	16.30 (50)	15.35 (63)					4.20	6.96
	E2	3.1	0.000			16.78 (49)	15.43 (14)	14.97 (67)					13.25	12.09
	E4	8.8	0.051				16.01 (86)	15.09 (44)					3.50	6.10
	E6	20.5	0.176			15.93 (85)		15.27 (45)					1.85	4.32
	E7	27.9	0.000						17.25 (51)	14.81 (26)	14.62 (39)	14.46 (13)	16.32	19.29
